# Supplementary material for: Challenges and Opportunities for the Translation of Single-Cell RNA Sequencing Technologies to Dermatology
Source: MDPI journal article supplement (doi:10.3390/life12010067), 2022-01-04
Supplement: s1 [file s1]

Table S1. Presence of mouse fibroblast subpopulation markers in human fibroblast subpopulations.

|                       |          |  |                    |          |  |                     |       |  |                    |         |  |                     |       |
|-----------------------|----------|--|--------------------|----------|--|---------------------|-------|--|--------------------|---------|--|---------------------|-------|
| <b><u>Col15a1</u></b> | ALL      |  | Anxa3              | -        |  | Ccl21a              | -     |  | Clca3a1            | -       |  | Ncam1               | -     |
| Gsn                   | A1/B     |  | Ly6c1              | -        |  | Clu                 | A/B2  |  | Tinag1             | -       |  | Sfrp1               | C     |
| Abca8a                | A1/B/C2  |  | Ly6a               | -        |  | <b><u>Ccl19</u></b> | B2    |  | Igfbp7             | B       |  | Tgm2                | -     |
| Smoc2                 | A        |  | Cd248              | A1       |  | Apoe                | B     |  | B2m                | ALL     |  | Bmp4                | A2/C  |
| Fbln2                 | A1/A4    |  | <b><u>Pi16</u></b> | A1/C1    |  | Des                 | -     |  | Ly6e               | A2      |  | Nkx2-3              | -     |
| Dcn                   | A1/C4    |  | Igfbp6             | A1/C4    |  | Enpp2               | ALL   |  | Ifitm3             | B2      |  | Spon2               | D     |
| Lum                   | A1/C4    |  | Timp2              | A        |  | C3                  | B2    |  | H2-D1              | -       |  | <b><u>Fbln1</u></b> | A     |
| Entpd2                | C4       |  | Emilin2            | A1       |  | Csf2rb              | -     |  | Lhfp               | -       |  | Plac8               | -     |
| Sparcl1               | C2       |  | Dpp4               | A1/A3    |  | Srgn                | -     |  | Emilin1            | ALL     |  | Rps12               | ALL   |
| Htra3                 | A4       |  | Ackr3              | A        |  | Vtn                 | -     |  | <b><u>Coch</u></b> | C2      |  | Mfap4               | ALL   |
| Cygb                  | B        |  | Lrrn4cl            | A        |  | B2m                 | ALL   |  | Slc40a1            | C2      |  | Tmem176a            | B     |
| Ccdc80                | A1/B     |  | Sema3c             | A1/A3    |  | Tmem176b            | B     |  | Plvap              | -       |  | Hes1                | B     |
| Penk                  | -        |  | Anxa1              | ALL      |  | Cpxm1               | A2/C1 |  | Ifit3              | -       |  | Pltp                | A/C1  |
| Crispld2              | C4       |  | Clec3b             | A1       |  | Mfge8               | C1    |  | Sept4              | -       |  | Ltbp4               | C2/C4 |
| Dpep1                 | C1       |  | Fn1                | A1/A4/C4 |  | Tmem176a            | B2    |  | Gdpd2              | -       |  | Fam198b             | -     |
| Anxa5                 | ALL      |  | Ugdh               | A1/C4    |  | H2-D1               | -     |  | Tcf21              | -       |  | Tmem176b            | B     |
| Col4a1                | A2/C1    |  | Efhdl1             | -        |  | Ifitm1              | B2    |  | Rtp4               | -       |  | Fhl1                | A     |
| Lama2                 | A2/C1    |  | Metrl              | -        |  | Cxcl12              | B     |  | Ifitm1             | B       |  | Ifitm1              | B     |
| Tcf4                  | A2/C2/C3 |  | Fbn1               | A1/A4    |  | Bst1                | -     |  | ligp1              | -       |  | Aldh1a3             | -     |
| Hspg2                 | ALL      |  | Pla1a              | -        |  | C2                  | -     |  | Frzb               | -       |  | Matn2               | C1/C4 |
|                       |          |  |                    |          |  |                     |       |  |                    |         |  |                     |       |
| Hp                    | -        |  | Inmt               | C4       |  | <b><u>Comp</u></b>  | A2    |  | <b><u>Hhip</u></b> | -       |  | Bmp5                | -     |
| Esm1                  | -        |  | Limch1             | C2       |  | 1500015O10Rik       | -     |  | Mustn1             | -       |  | Tmem158             | -     |
| <b><u>Cxcl12</u></b>  | B        |  | <b><u>Npnt</u></b> | -        |  | Fxyd6               | B2    |  | Grem2              | A       |  | Adamdec1            | B2    |
| Adipoq                | -        |  | Macf1              | -        |  | Cilp                | A1/A4 |  | Enpp2              | A2/B2/C |  | Nbl1                | A     |
| Spp1                  | -        |  | Mfap4              | ALL      |  | Ptn                 | B/C3  |  | Rgs2               | A2      |  | <b><u>Bmp4</u></b>  | -     |
| Gdpd2                 | -        |  | Csrp1              | C4       |  | Pdgfrl              | A1    |  | Aspn               | C       |  | Ednrb               | C1    |
| Cxcl14                | A        |  | Gyg                | -        |  | Ctgf                | C1/A2 |  | 6330403K07Rik      | -       |  | Tmem119             | A2/C1 |

Table S1. Ascensión et al. (continued)

|               |        |  |          |       |  |        |       |  |        |       |  |         |       |
|---------------|--------|--|----------|-------|--|--------|-------|--|--------|-------|--|---------|-------|
| Igfbp4        | A      |  | Fhl1     | A     |  | Cthrc1 | A1    |  | Sgcg   | A     |  | Aldh1a1 | A1/B1 |
| Gas6          | A      |  | Mettl7a1 | -     |  | Cst3   | ALL   |  | Cyp2e1 | -     |  | Nkx2-3  | -     |
| Runx1         | A2/B1  |  | Mgp      | A1/B1 |  | Timp1  | ALL   |  | Btg2   | C2/C4 |  | Tspan13 | -     |
| Ibsp          | -      |  | Cdo1     | -     |  | Vim    | ALL   |  | Thbs1  | A2/C1 |  | Emid1   | C2    |
| Kitl          | -      |  | Ppp1r14a | C     |  | Plod2  | -     |  | P2ry14 | B2/C4 |  | Cald1   | C1    |
| Rgcc          | A2     |  | Sept4    | -     |  | Tm4sf1 | C4    |  | Sftpc  | -     |  | Rgs10   | -     |
| Pappa         | -      |  | Sod3     | ALL   |  | Prg4   | A4    |  | Acta2  | C1    |  | Fhl1    | ALL   |
| Serpine2      | A2/ALL |  | Fmo2     | C4    |  | Ddah1  | -     |  | Pde4b  | -     |  | Tgm2    | -     |
| Kng2          | -      |  | Lbh      | A2    |  | Fibin  | C2    |  | Bmp5   | -     |  | Fhl2    | A1    |
| Cebpa         | -      |  | Pcolce2  | A1/A4 |  | Thbs4  | A3/C2 |  | Mgp    | B     |  | Sept4   | -     |
| Slc6a6        | -      |  | Itga8    | -     |  | Runx1  | A2/B1 |  | Cdh4   | -     |  | Tpm2    | A1    |
| 1500009L16Rik | -      |  | Hsd11b1  | -     |  | Fmod   | C2    |  | Hmgb1  | ALL   |  | Bmp7    | -     |
| Ebf3          | -      |  | Selenbp1 | -     |  | Col1a1 | ALL   |  | Tagln  | C1/C4 |  | Myl9    | C1    |
